# Supplementary material for: Most Human Proteins Made in Both Nucleus and Cytoplasm Turn Over within Minutes
Source: PubMed Central journal article supplement (PMC4050049; doi:10.1371/journal.pone.0099346), 2014-06-09
Supplement: pone.0099346.s005.pdf [file pone.0099346.s005.pdf]

1066 **Table S1.** Oligonucleotide DNA primers.

| # | Name                      | Sequence (5'-3')                                                                                                                                           |
|---|---------------------------|------------------------------------------------------------------------------------------------------------------------------------------------------------|
| 1 | Oligo pair 1              | Fwd: GCAGA(CTGCAG) <sup>b</sup> AGAGACAGTGG<br>Rev: CAGCATCTCCAGCCTTCTTC                                                                                   |
| 2 | Oligo pair 2              | Fwd: ATCCACAGAAAGGTGCTCGT<br>Rev: TA(GGATCC) <sup>c</sup> AT(TGTTTCGTCGTCG) <sup>d</sup> CTTTGAGACCATCTCTAAAAG                                             |
| 3 | Oligo pair 3              | Fwd: AC(TCTAGA) <sup>e</sup> AAGACAGGCAGTCTCTG<br>Rev: TA(GGATCC) <sup>c</sup> AT(TGTTTCGTCGTCG) <sup>d</sup> CTTTGAGACCATCTCTAAAAG                        |
| 4 | Oligo pair 4 <sup>a</sup> | Fwd: CACCCTCGTGACCACCTGCTTCAGCCGCTAC<br>Rev: GTAGCGGCTGAAGCAGGTGGTCACGAGGGTG                                                                               |
| 5 | Oligo pair 5 <sup>a</sup> | Fwd: GGACGGGTGCTATG(TACCCTTACGACGTTCCCTGATTACGCT) <sup>f</sup> TAGCAAGTTGGG<br>Rev: CCCCAACTTGCTA(AGCGTAATCAGGAACGTCGTAAGGGTA) <sup>f</sup> CATAGCACCCGTCC |
| 6 | Oligo pair 6 <sup>a</sup> | Fwd: GAGATGACAGTGGCACC(TAA) <sup>g</sup> AATGTAACGGTATACAGCAC<br>Rev: GTGCTGTATACCGTTACATT(TTA) <sup>g</sup> GGTGCCACTGTCATCTC                             |
| 7 | Oligo 7                   | GCCATCATCCAACAGAGCAG                                                                                                                                       |
| 8 | Oligo 8                   | CGTCGCCGTCCAGCTCGACCAG                                                                                                                                     |
| 9 | Oligo 9                   | TGCCCTTCAGCTCGATGCGG                                                                                                                                       |

1067 <sup>a</sup>: complimentary oligonucleotide primers for site-directed mutagenesis, HPLC purified

1068 <sup>b</sup>: *PstI* recognition sequence

1069 <sup>c</sup>: *BamHI* recognition sequence

1070 <sup>d</sup>: ribosome pause sequence (rps)

1071 <sup>e</sup>: *XbaI* recognition sequence

1072 <sup>f</sup>: HA-epitope encoding sequence

1073 <sup>g</sup>: premature termination codon (PTC)

1074
